# Supplementary material
Source: PubMed Central journal article supplement (PMC3205191)

## Supporting Information for

### **Fijimycins A-C, three antibacterial etamycin-class depsipeptides from a marine-derived *Streptomyces* sp.**

Peng Sun,<sup>†</sup> Katherine N. Maloney,<sup>†</sup> Sang-Jip Nam,<sup>†</sup> Nina M. Haste,<sup>§</sup> Ritesh Raju<sup>‡</sup>, William Aalbersberg<sup>‡</sup>, Paul R. Jensen,<sup>†</sup> Victor Nizet,<sup>+,§</sup> Mary E. Hensler,<sup>+</sup> and William Fenical<sup>†,§\*</sup>

<sup>†</sup>*Center for Marine Biotechnology and Biomedicine, Scripps Institution of Oceanography, University of California, San Diego, La Jolla, CA 92093-0204 USA*

<sup>§</sup>*Skaggs School of Pharmacy and Pharmaceutical Sciences, University of California,- San Diego, La Jolla, CA 92093-0687 USA*

<sup>+</sup>*Department of Pediatrics, University of California – San Diego, La Jolla, CA 92093-0687 USA;*

<sup>‡</sup>*Institute of Applied Sciences, University of the South Pacific, Suva, Fiji*

## Table of Contents

|                    |                                                                                                |     |
|--------------------|------------------------------------------------------------------------------------------------|-----|
| <b>Figure S1.</b>  | $^1\text{H}$ NMR Spectrum of Fijimycin A ( <b>1</b> ) at (500 MHz) in $\text{CDCl}_3$ .....    | S3  |
| <b>Figure S2.</b>  | $^{13}\text{C}$ NMR Spectrum of Fijimycin A ( <b>1</b> ) at (300 MHz) in $\text{CDCl}_3$ ..... | S4  |
| <b>Figure S3.</b>  | gCOSY NMR Spectrum of Fijimycin A ( <b>1</b> ) at (500 MHz) in $\text{CDCl}_3$ .....           | S5  |
| <b>Figure S4.</b>  | gHSQC NMR Spectrum of Fijimycin A ( <b>1</b> ) at (500 MHz) in $\text{CDCl}_3$ .....           | S6  |
| <b>Figure S5.</b>  | gHMBC NMR Spectrum of Fijimycin A ( <b>1</b> ) at (500 MHz) in $\text{CDCl}_3$ .....           | S7  |
| <b>Figure S6.</b>  | TOCSY NMR Spectrum of Fijimycin A ( <b>1</b> ) at (500 MHz) in $\text{CDCl}_3$ .....           | S8  |
| <b>Figure S7.</b>  | $^1\text{H}$ NMR Spectrum of Fijimycin B ( <b>2</b> ) at (500 MHz) in $\text{CDCl}_3$ .....    | S9  |
| <b>Figure S8.</b>  | gCOSY NMR Spectrum of Fijimycin B ( <b>2</b> ) at (500 MHz) in $\text{CDCl}_3$ .....           | S10 |
| <b>Figure S9.</b>  | gHSQC NMR Spectrum of Fijimycin B ( <b>2</b> ) at (500 MHz) in $\text{CDCl}_3$ .....           | S11 |
| <b>Figure S10.</b> | gHMBC NMR Spectrum of Fijimycin B ( <b>2</b> ) at (500 MHz) in $\text{CDCl}_3$ .....           | S12 |
| <b>Figure S11.</b> | TOCSY NMR Spectrum of Fijimycin B ( <b>2</b> ) at (500 MHz) in $\text{CDCl}_3$ .....           | S13 |
| <b>Figure S12.</b> | $^1\text{H}$ NMR Spectrum of Fijimycin C ( <b>3</b> ) at (500 MHz) in $\text{CDCl}_3$ .....    | S14 |
| <b>Figure S13.</b> | gCOSY NMR Spectrum of Fijimycin C ( <b>3</b> ) at (500 MHz) in $\text{CDCl}_3$ .....           | S15 |
| <b>Figure S14.</b> | gHSQC NMR Spectrum of Fijimycin C ( <b>3</b> ) at (500 MHz) in $\text{CDCl}_3$ .....           | S16 |
| <b>Figure S15.</b> | gHMBC NMR Spectrum of Fijimycin C ( <b>3</b> ) at (500 MHz) in $\text{CDCl}_3$ .....           | S17 |
| <b>Figure S16.</b> | TOCSY NMR Spectrum of Fijimycin C ( <b>3</b> ) at (500 MHz) in $\text{CDCl}_3$ .....           | S18 |

**Figure S1.**  $^1\text{H}$  NMR Spectrum of Fijimycin A (**1**) at (500 MHz) in  $\text{CDCl}_3$

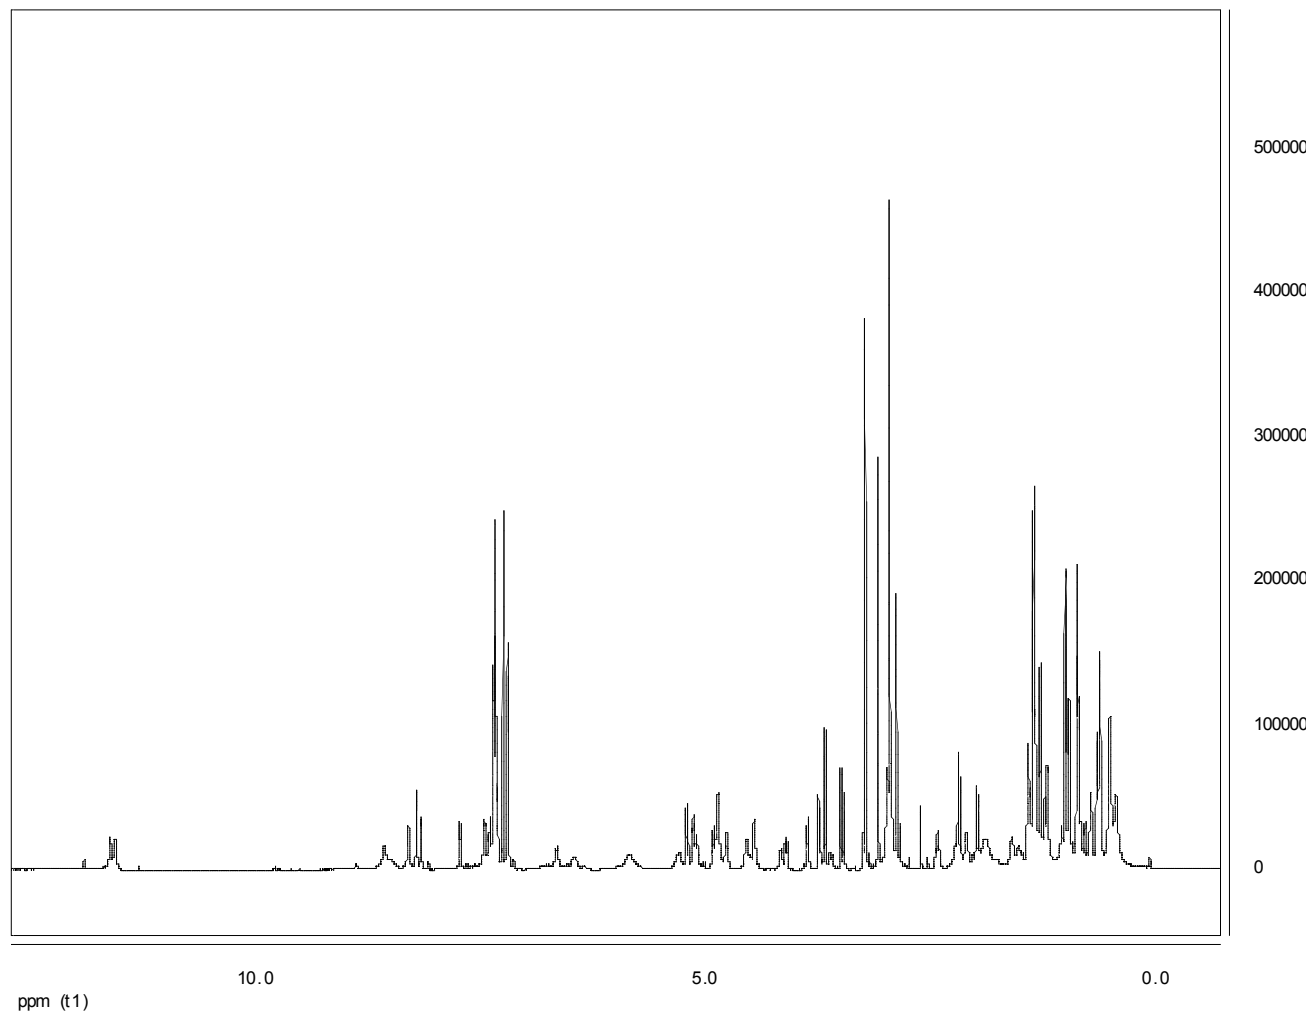

**Figure S2.**  $^{13}\text{C}$  NMR Spectrum of Fijimycin A (**1**) at (300 MHz) in  $\text{CDCl}_3$

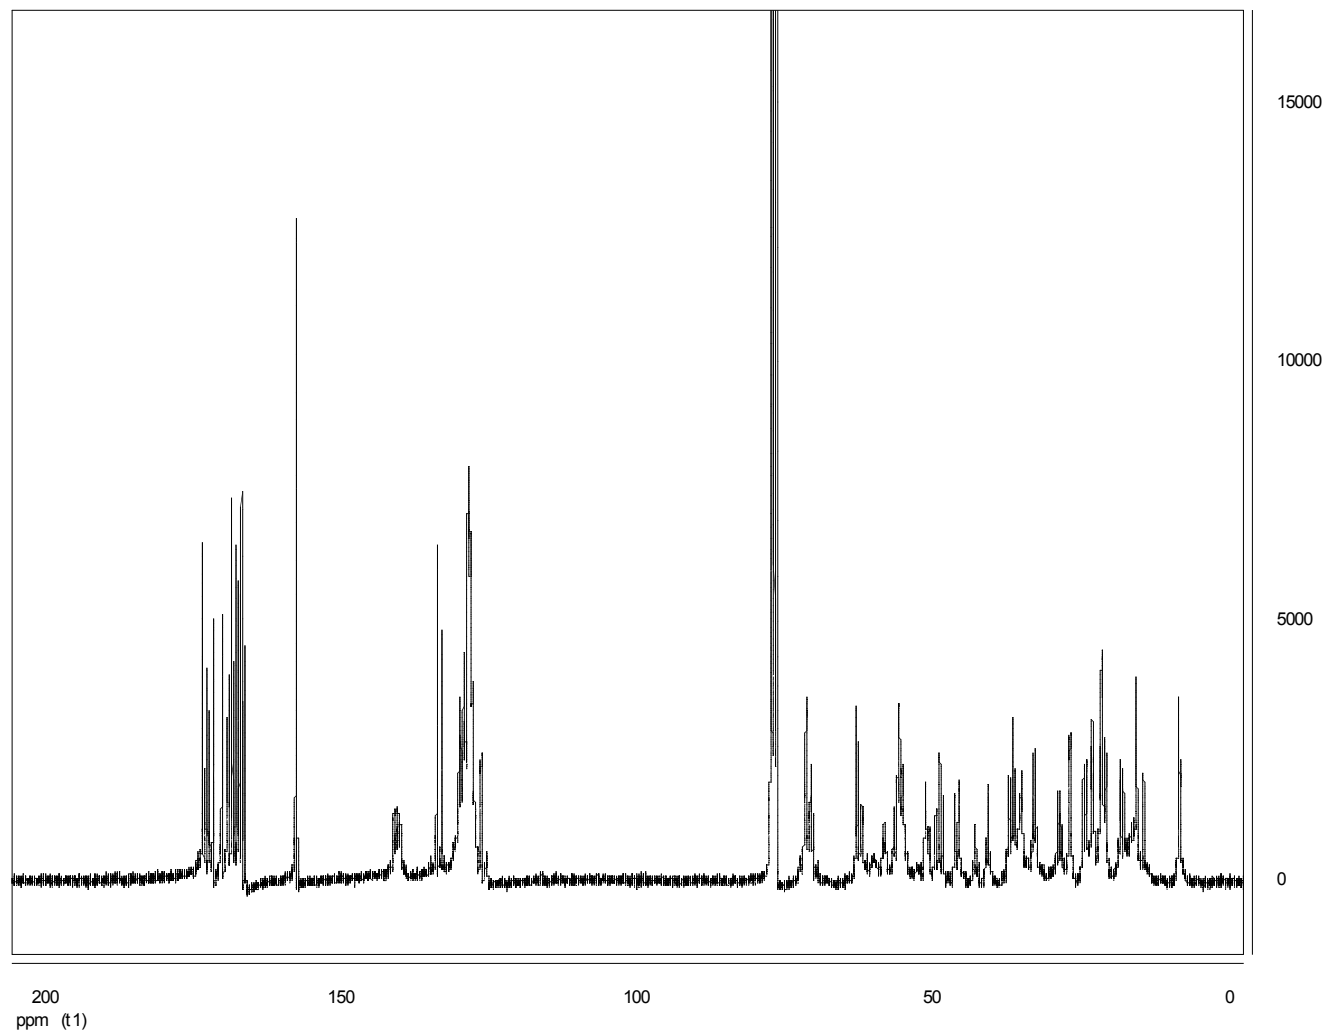

**Figure S3.** gCOSY NMR Spectrum of Fijimycin A (**1**) at (500) in CDCl<sub>3</sub>

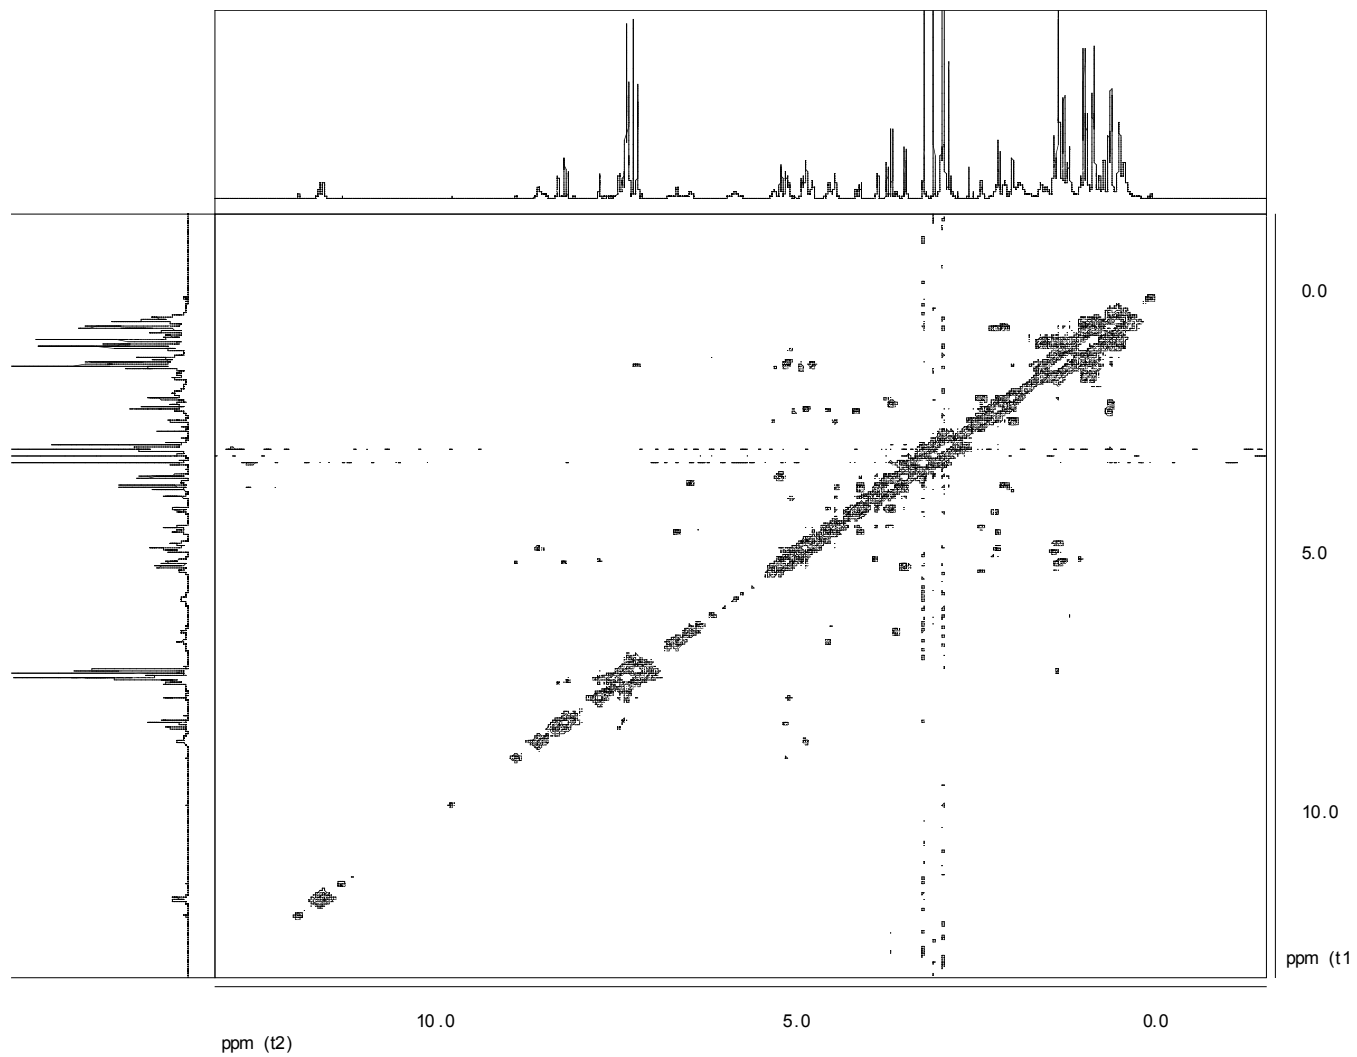

**Figure S4.** gHSQC NMR Spectrum of Fijimycin A (**1**) at (500 MHz) in CDCl<sub>3</sub>

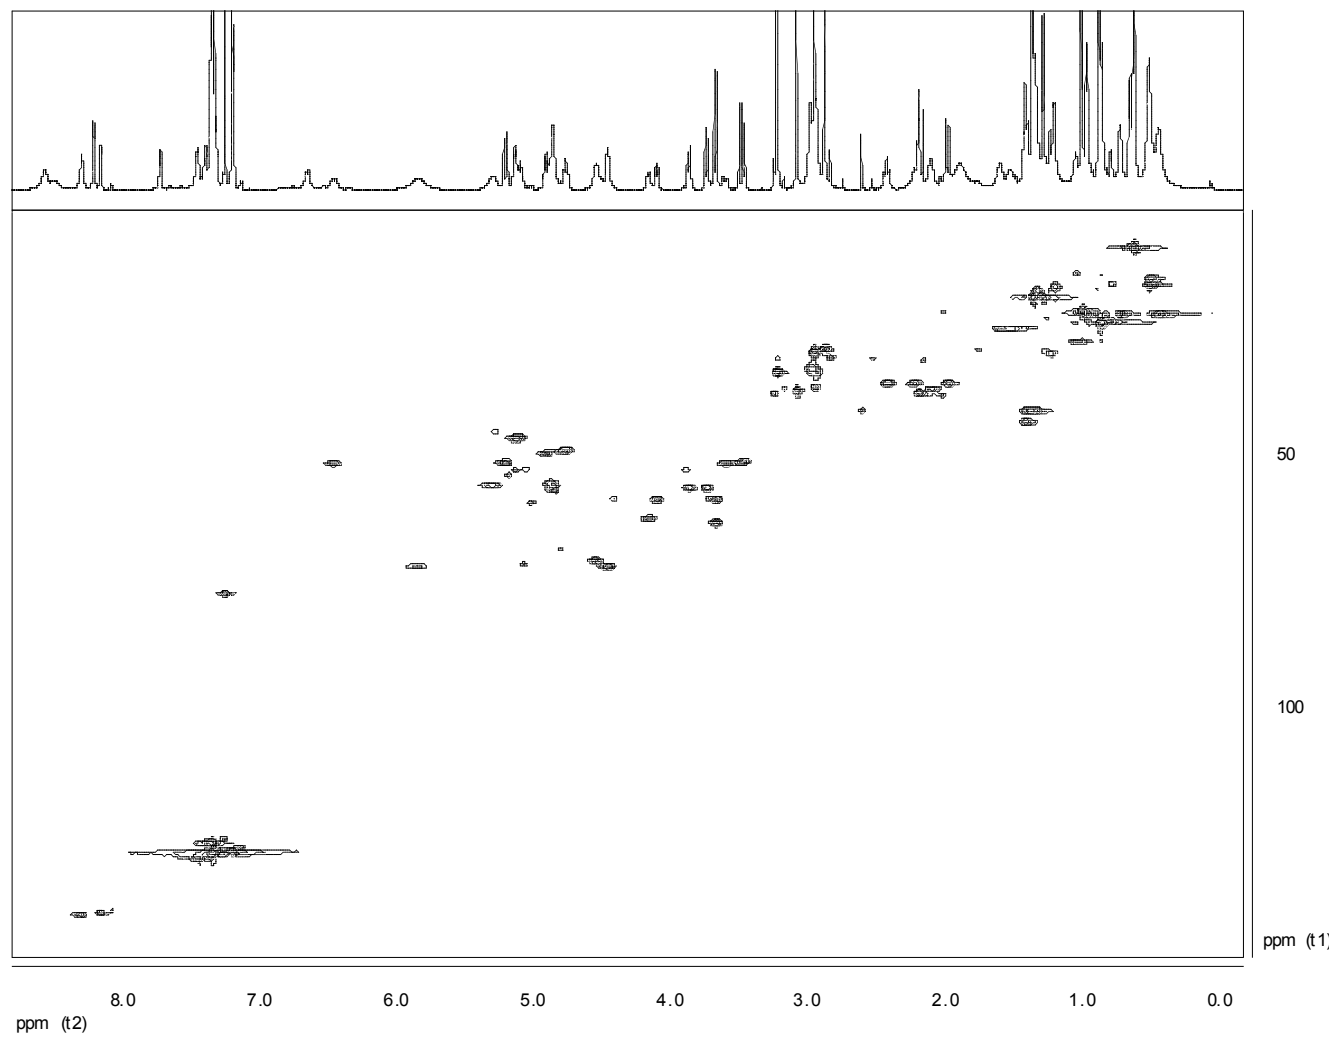

**Figure S5.** gHMBC NMR Spectrum of Fijimycin A (**1**) at (500 MHz) in  $\text{CDCl}_3$

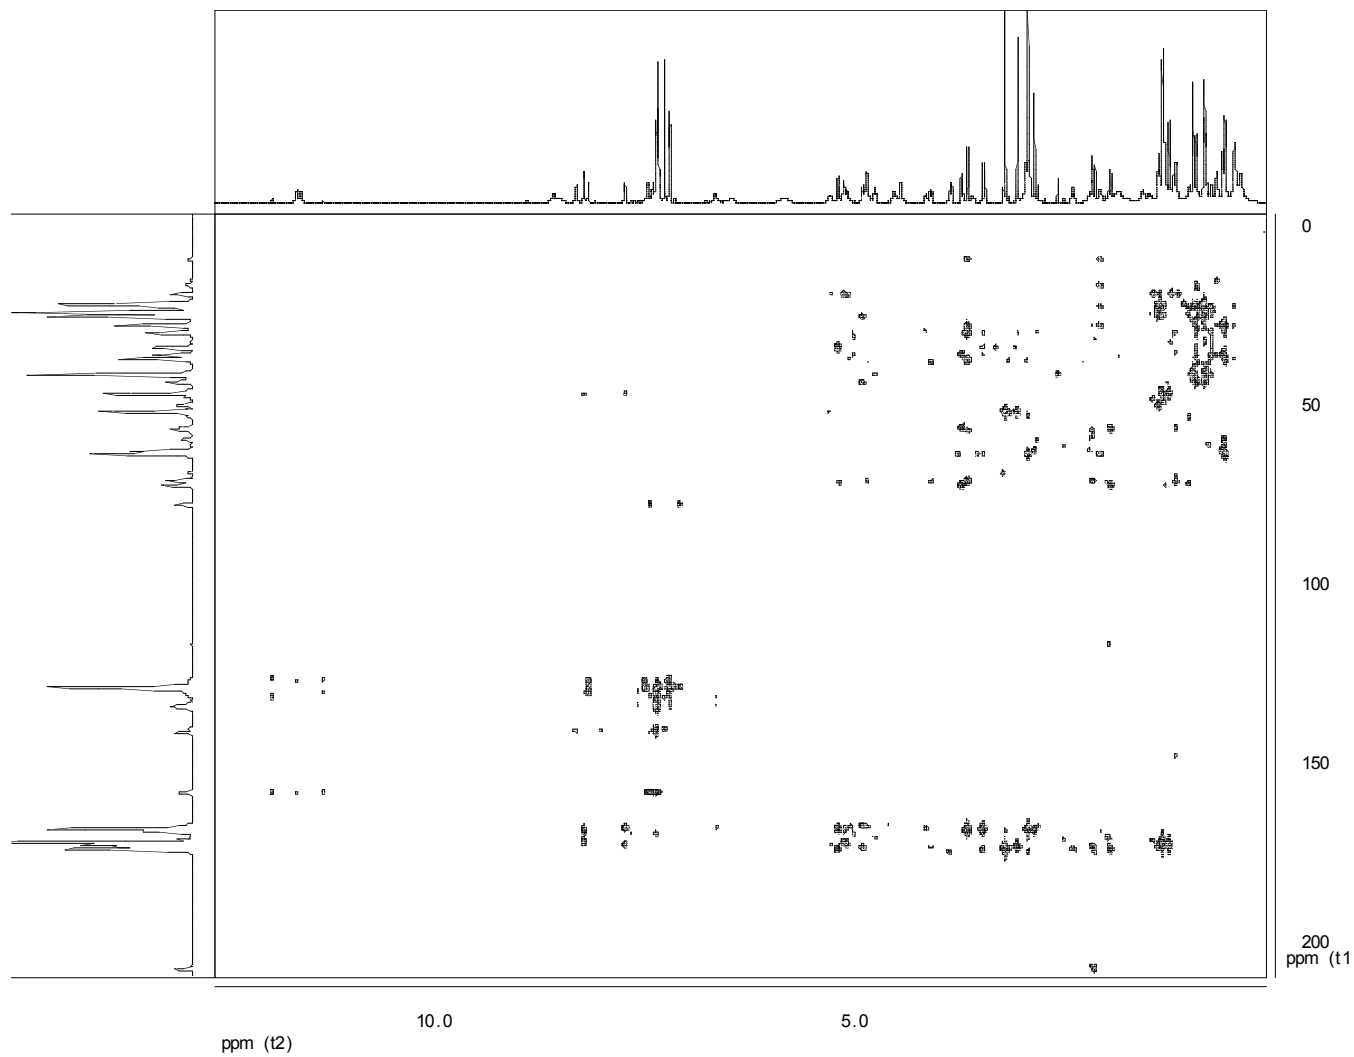

**Figure S6.** TOCSY NMR Spectrum of Fijimycin A (**1**) at (500) in CDCl<sub>3</sub>

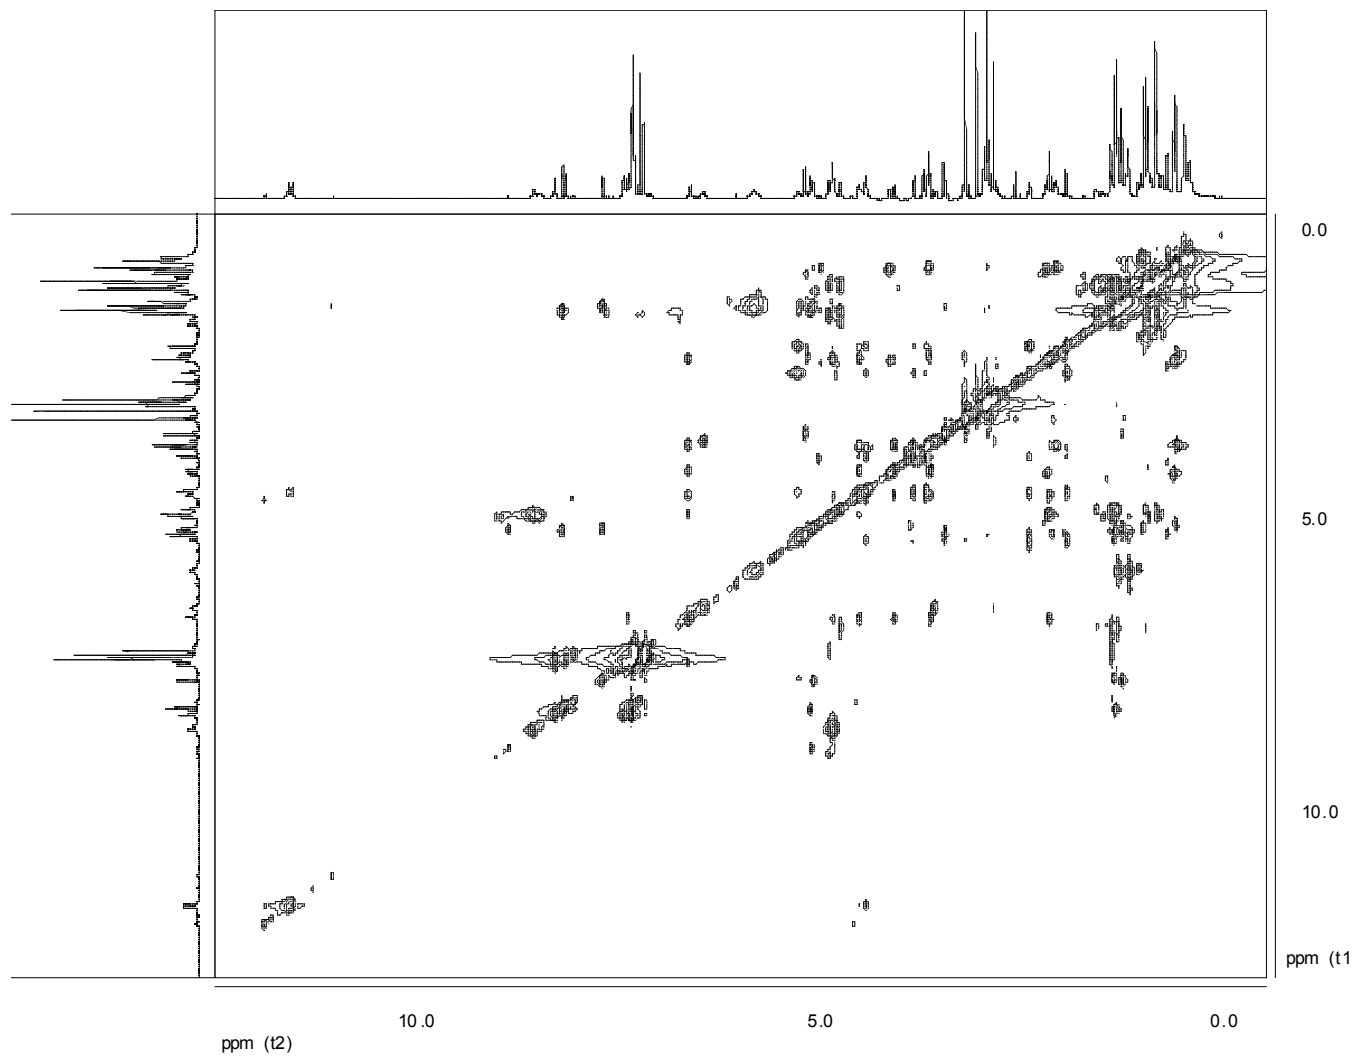



**Figure S7.**  $^1\text{H}$  NMR Spectrum of Fijimycin B (**2**) at (500 MHz) in  $\text{CDCl}_3$

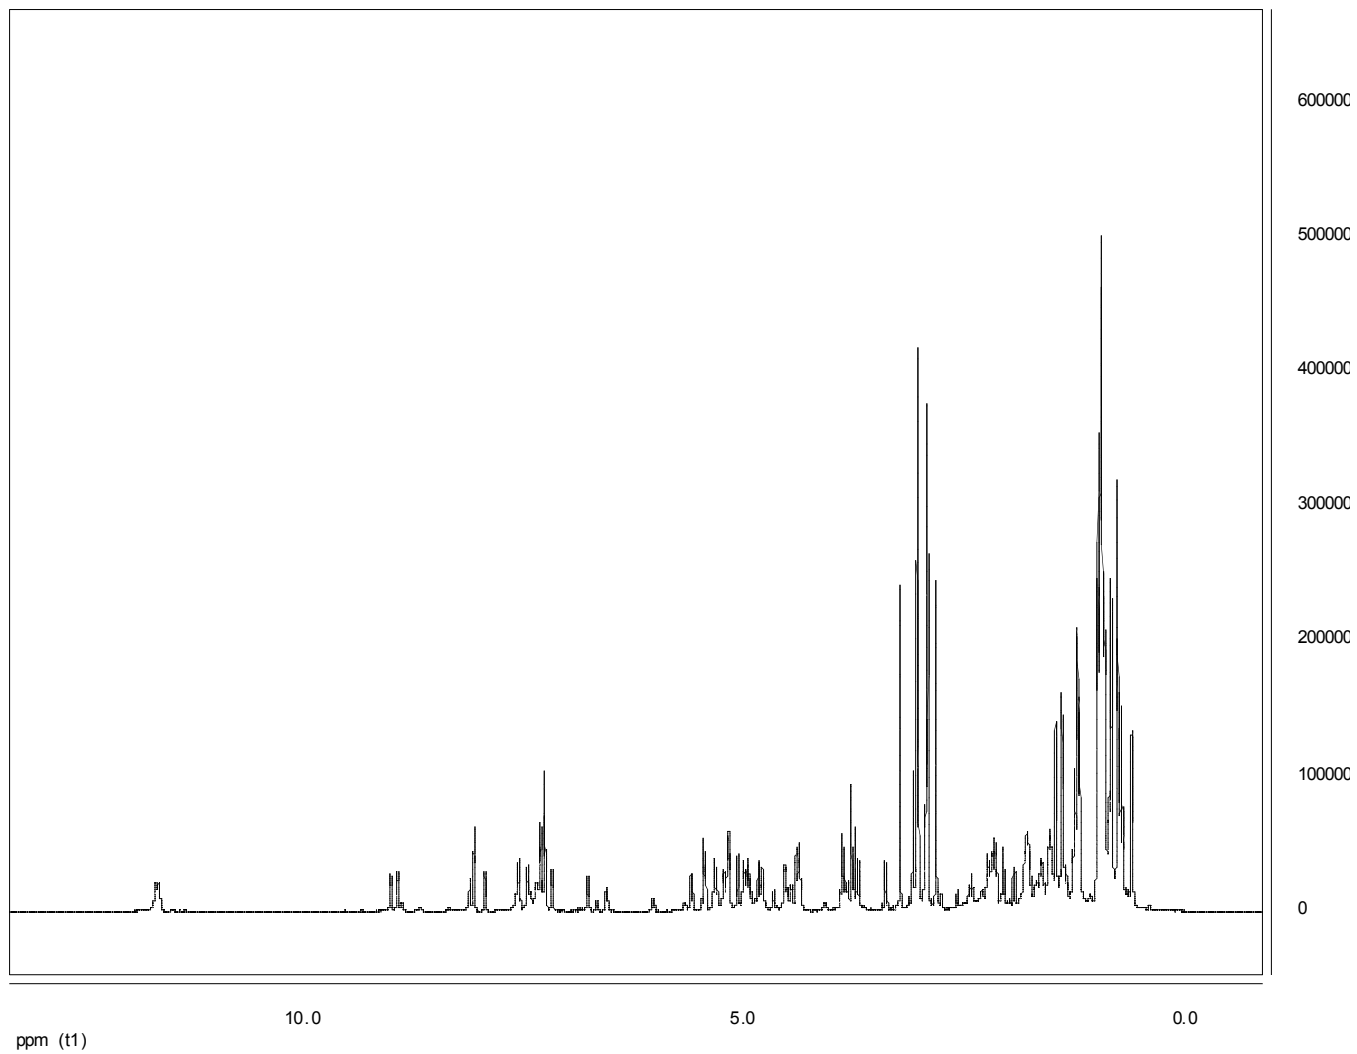

**Figure S8.** gCOSY NMR Spectrum of Fijimycin B (**2**) at (500) in CDCl<sub>3</sub>

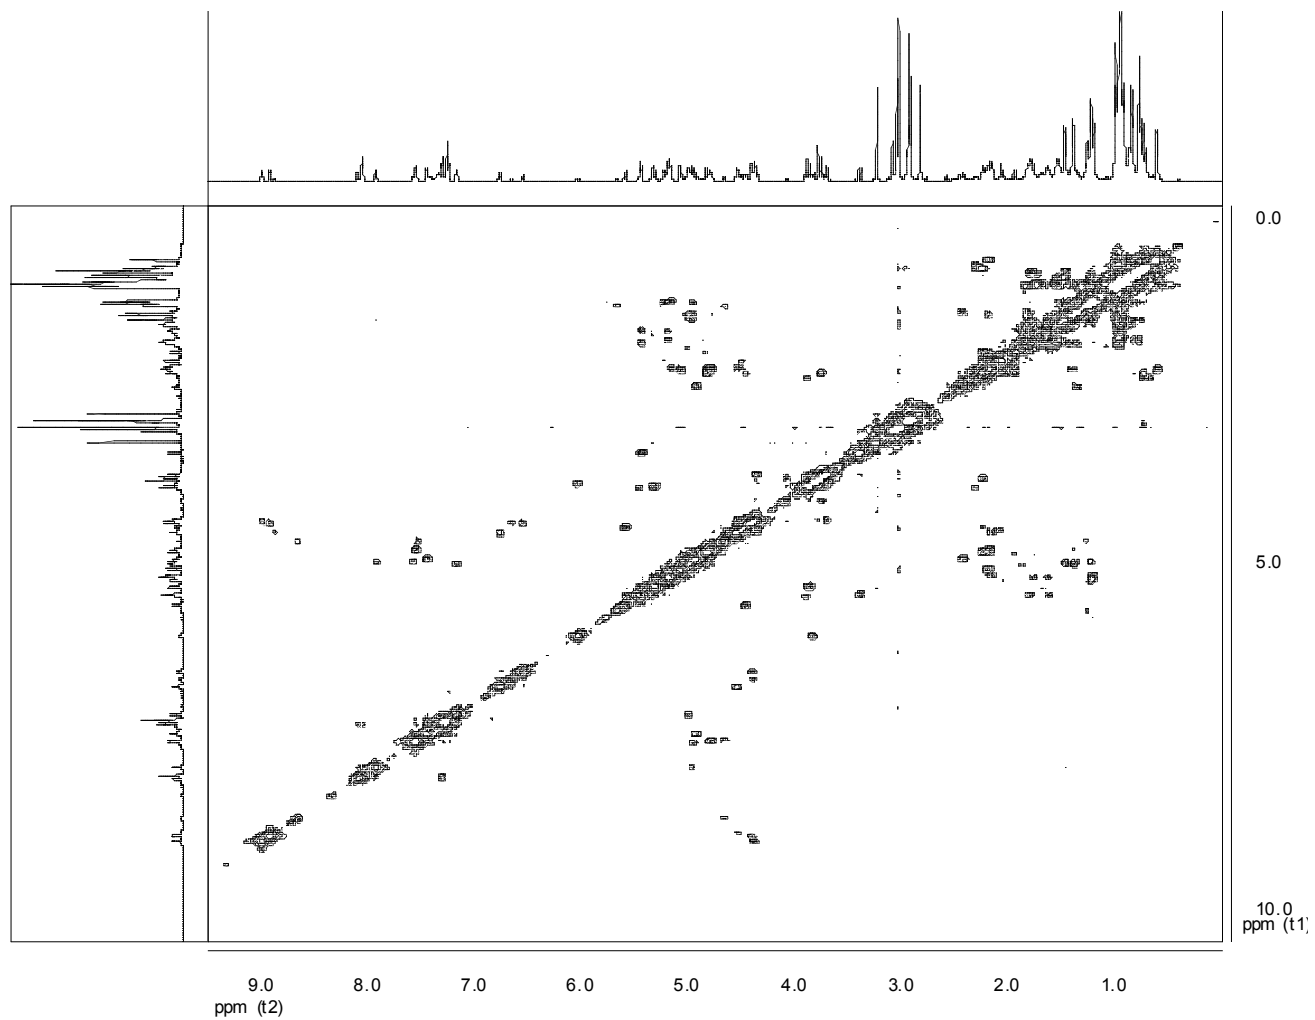

**Figure S9.** gHSQC NMR Spectrum of Fijimycin B (**2**) at (500 MHz) in CDCl<sub>3</sub>

**Figure S10.** gHMBC NMR Spectrum of Fijimycin B (**2**) at (500 MHz) in  $\text{CDCl}_3$

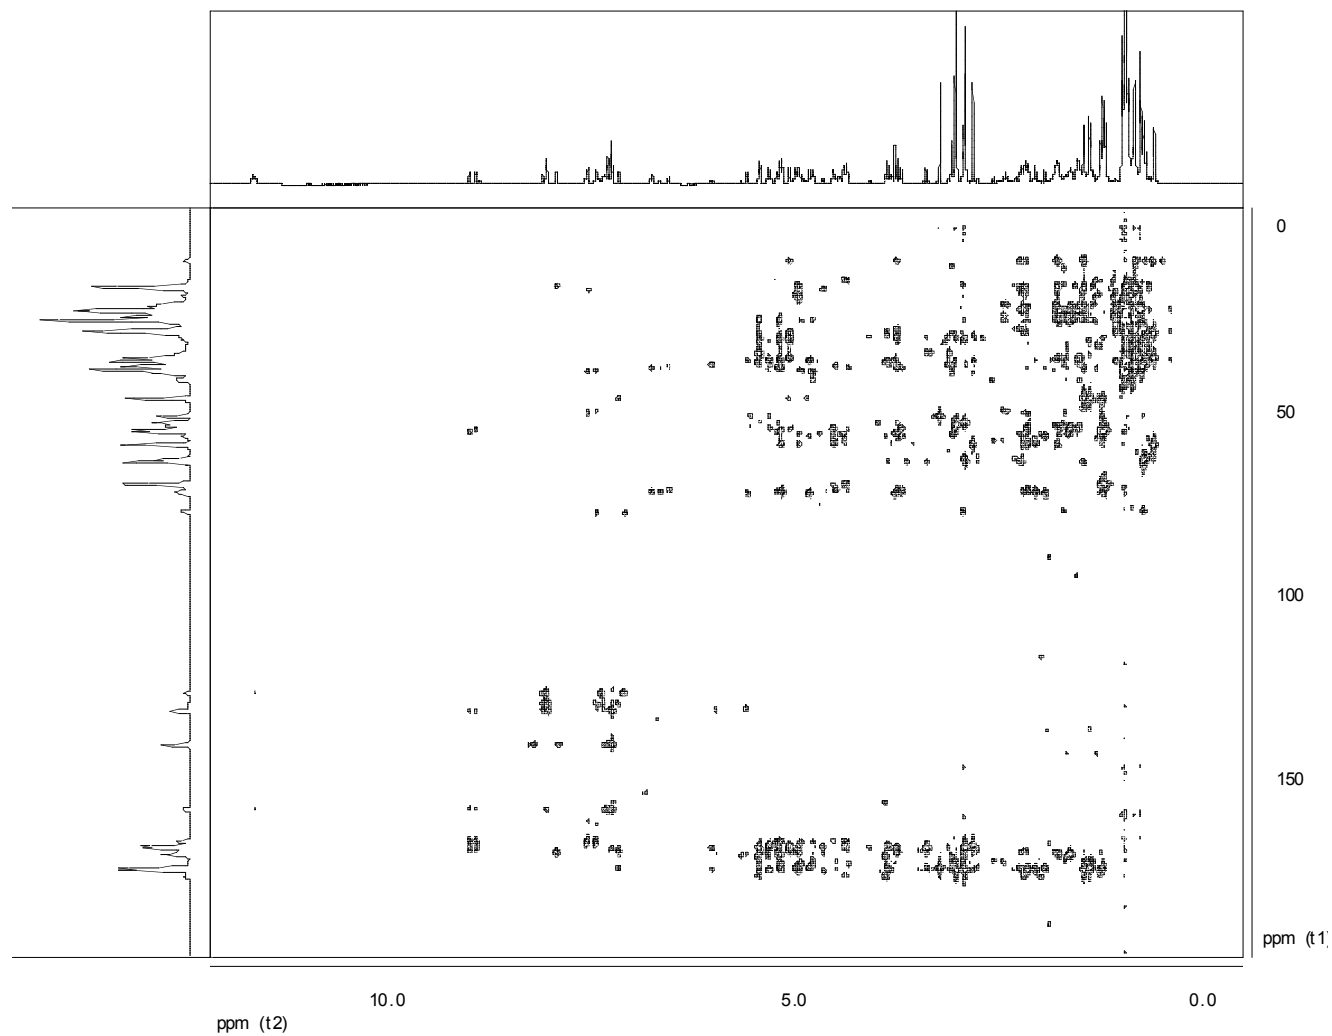

**Figure S11.** TOCSY NMR Spectrum of Fijimycin B (2) at (500) in CDCl<sub>3</sub>

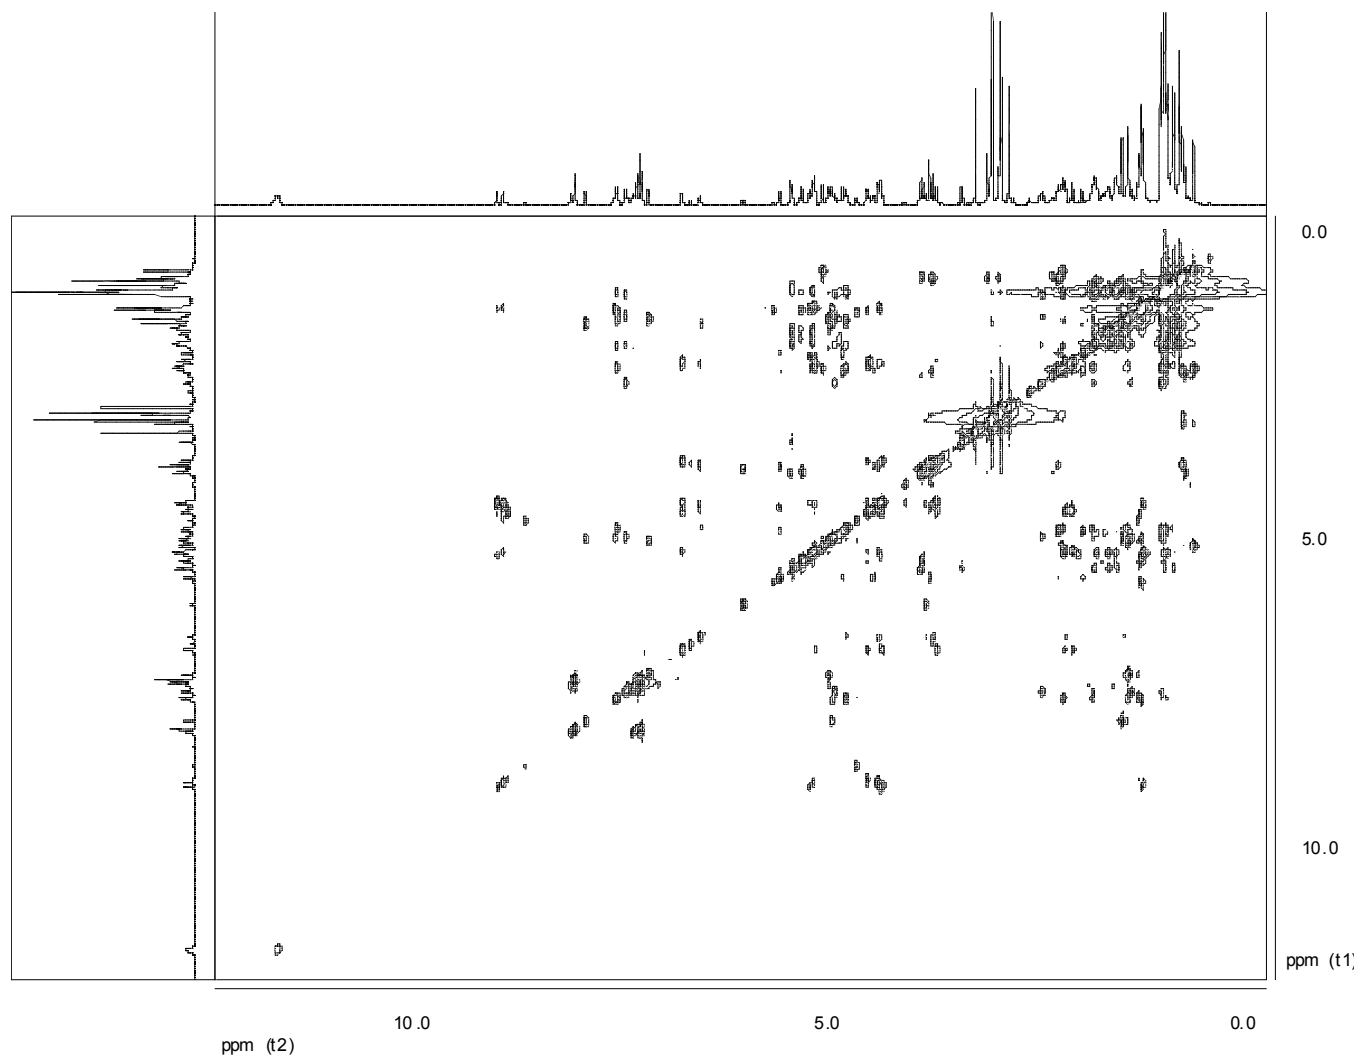

**Figure S12.**  $^1\text{H}$  NMR Spectrum of Fijimycin C (**3**) at (500 MHz) in  $\text{CDCl}_3$

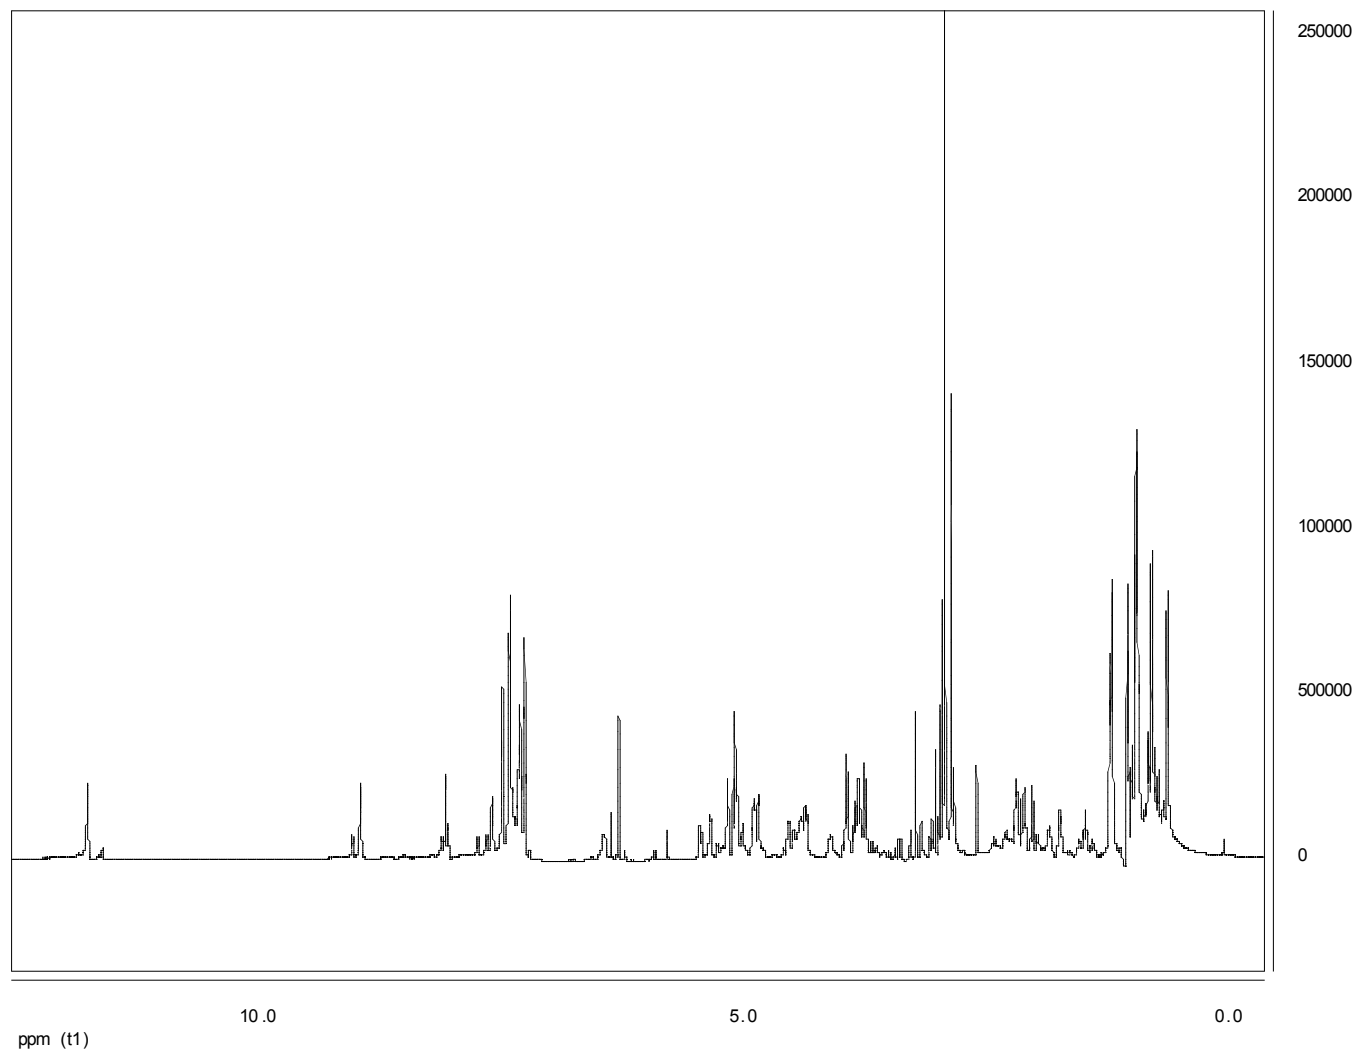

**Figure S13.** gCOSY NMR Spectrum of Fijimycin C (**3**) at (500) in CDCl<sub>3</sub>

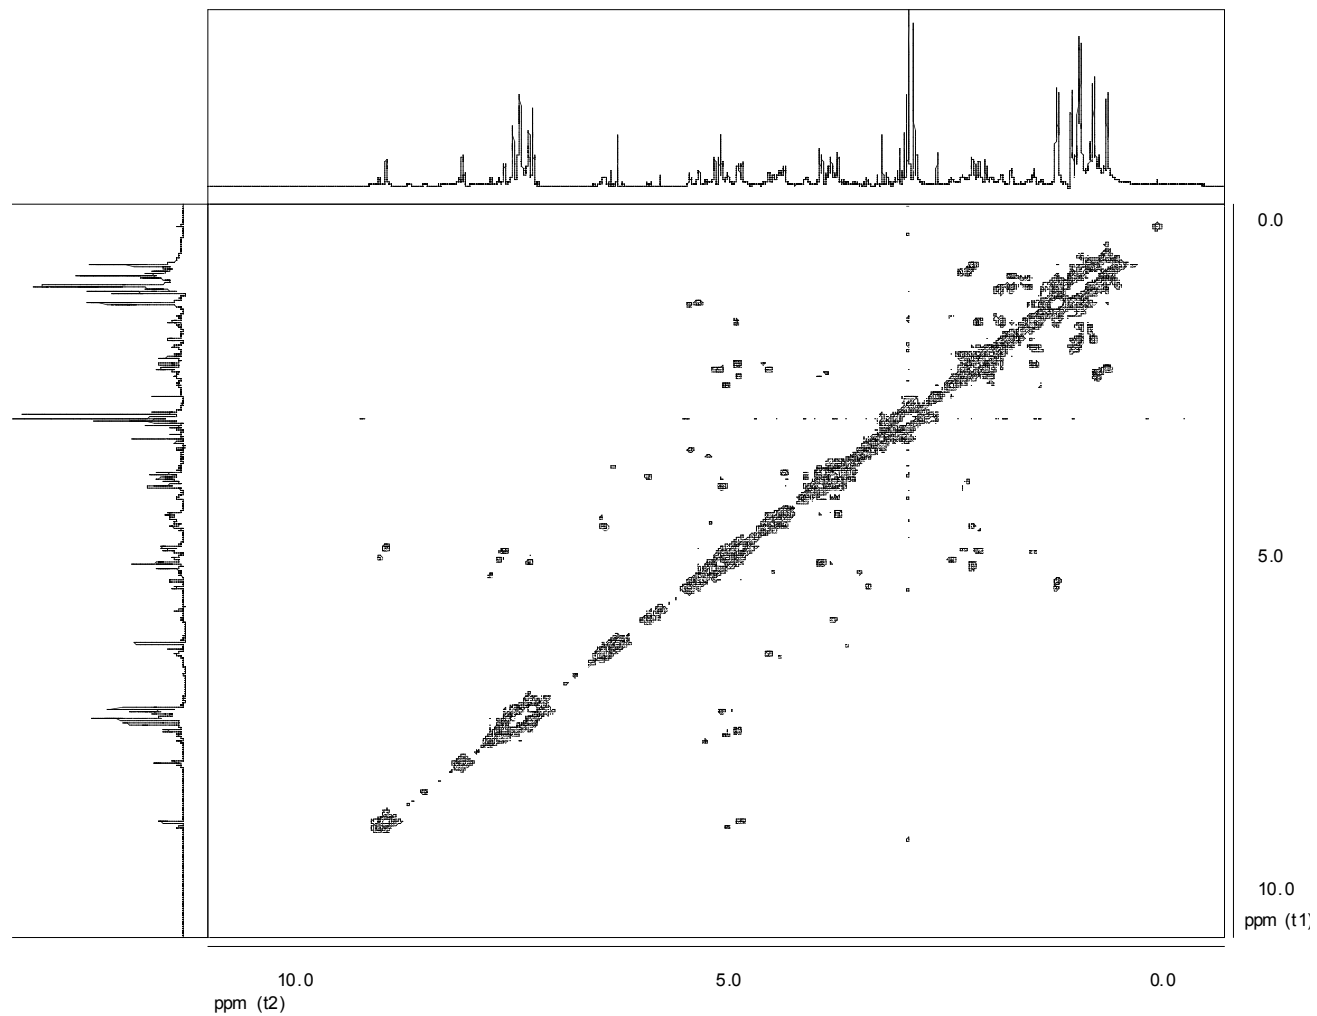

**Figure S14.** gHSQC NMR Spectrum of Fijimycin C (**3**) at (500 MHz) in CDCl<sub>3</sub>

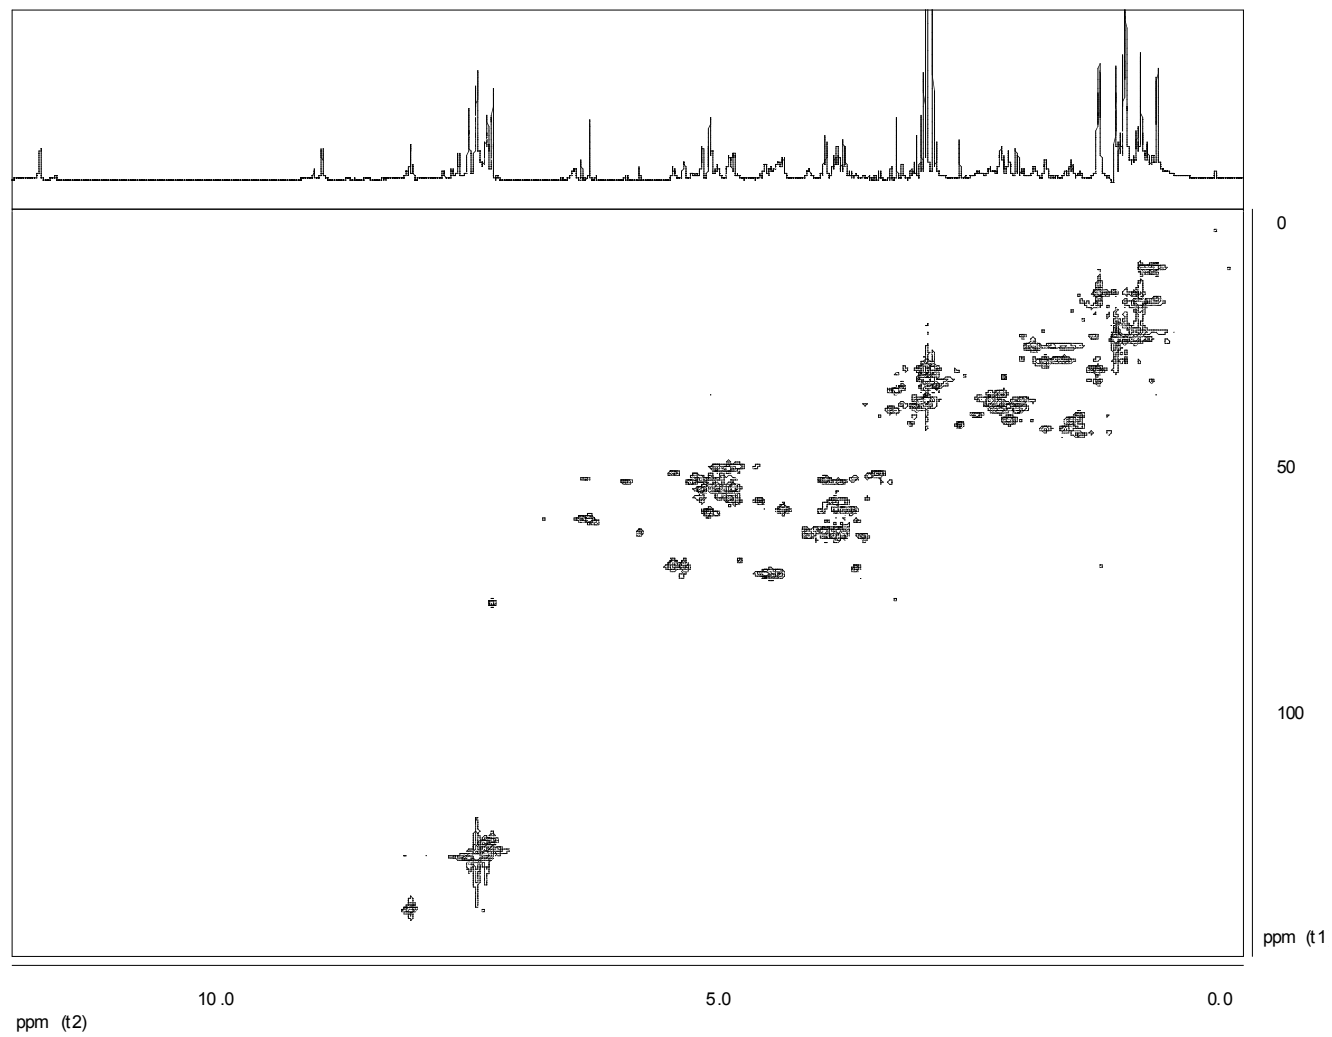



**Figure S15.** gHMBC NMR Spectrum of Fijimycin C (**3**) at (500 MHz) in CDCl<sub>3</sub>

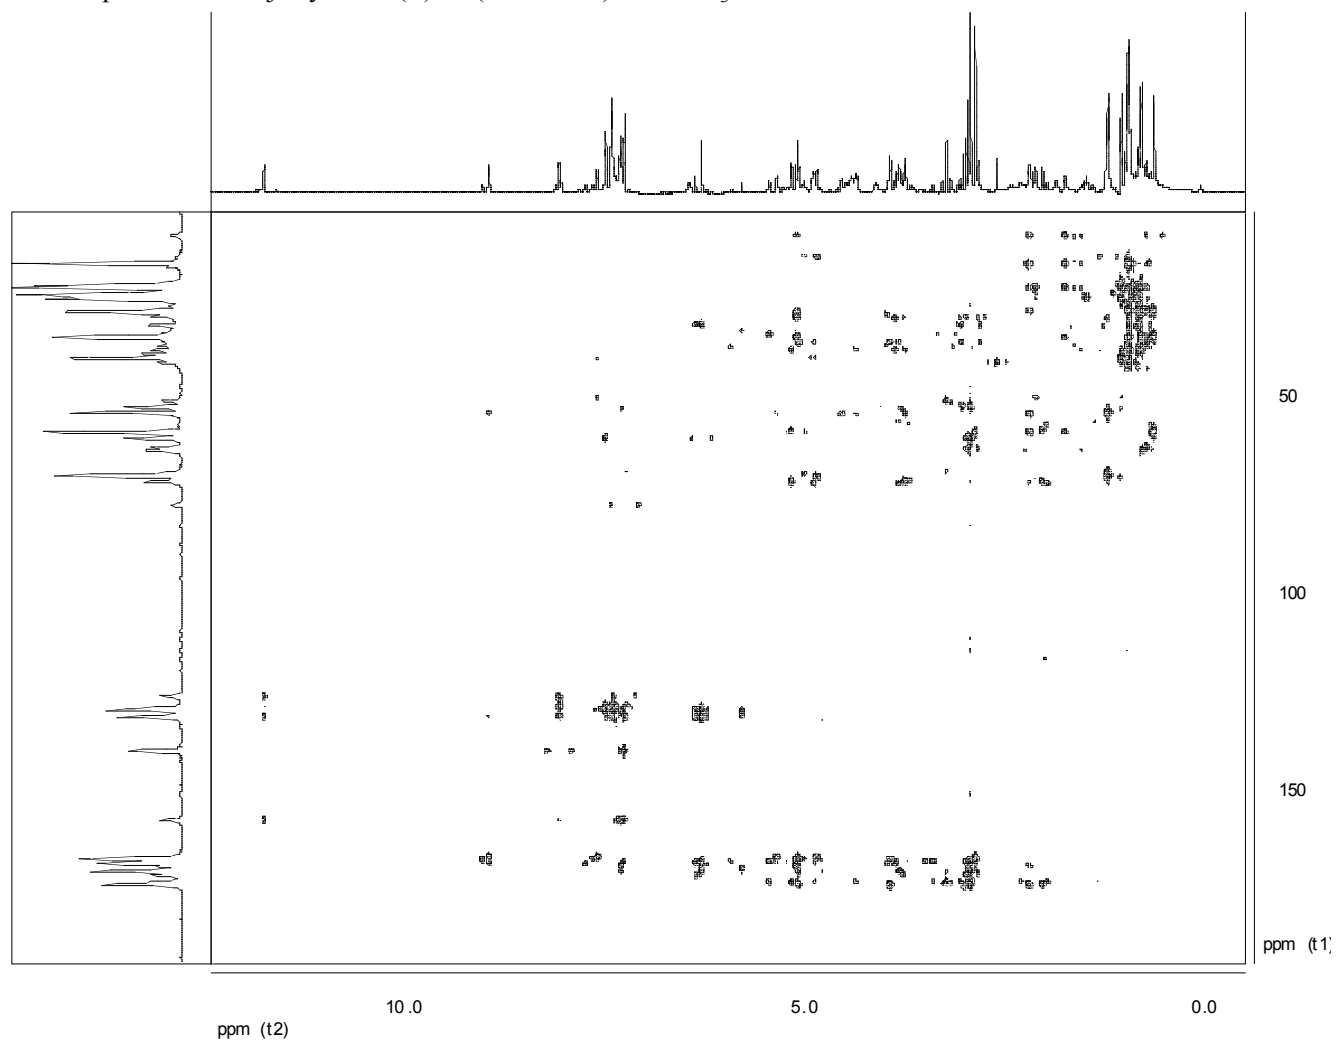

**Figure S16.** TOCSY NMR Spectrum of Fijimycin C (**3**) at (500) in CDCl<sub>3</sub>

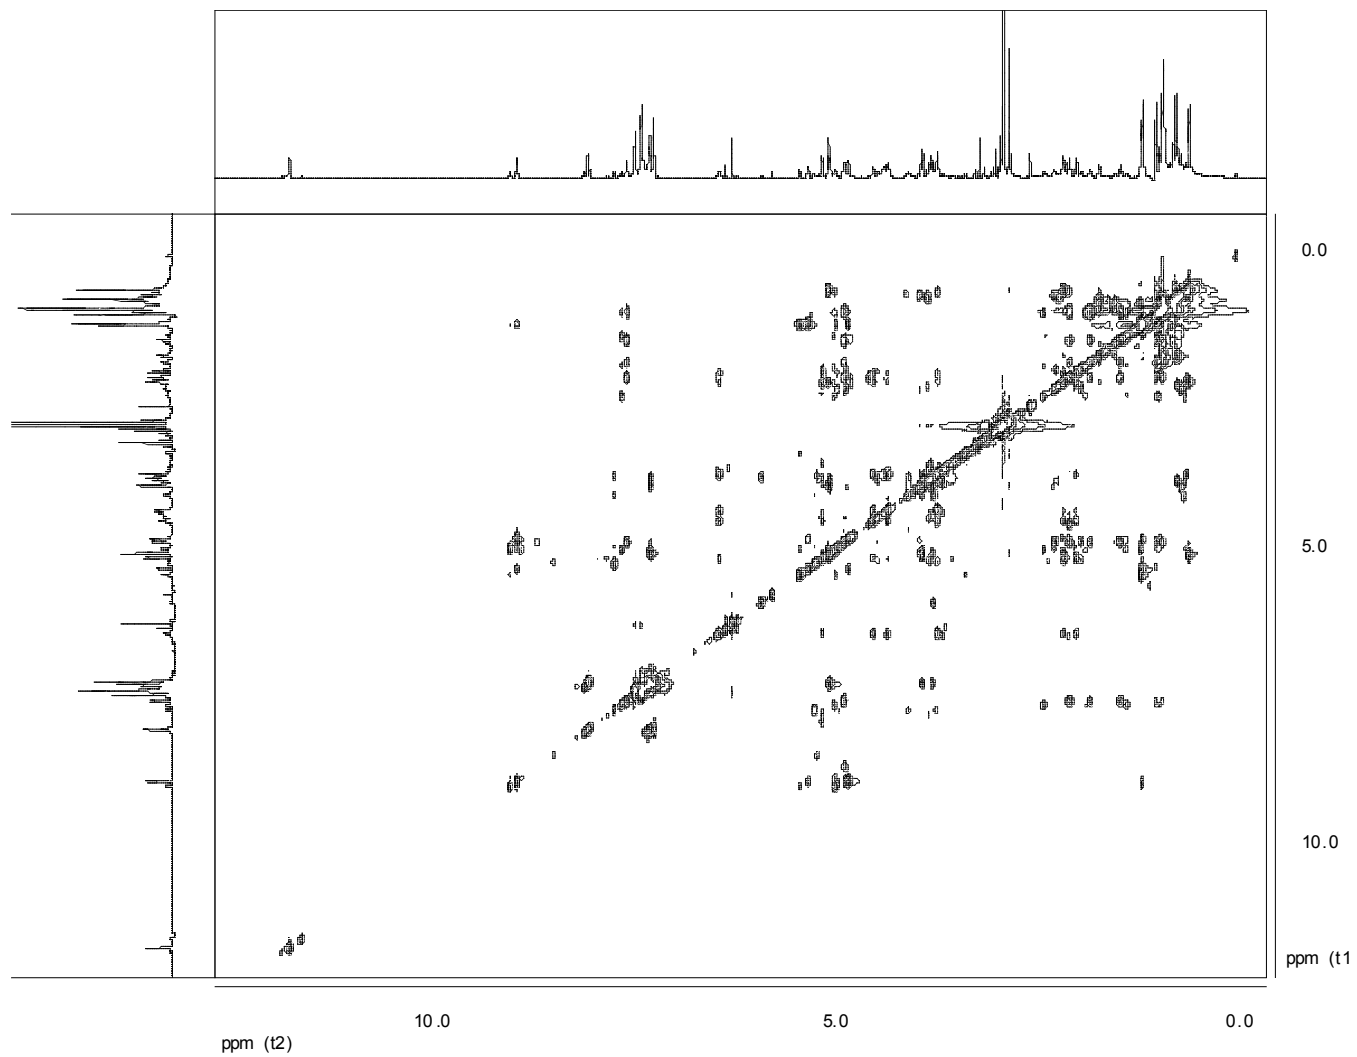

Supplement: NIHMS314083-supplement-01.pdf [file NIHMS314083-supplement-01.pdf]
